# Supplementary material for: Impact of Genetic Variants on the Individual Potential for Body Fat Loss
Source: MDPI journal article supplement (doi:10.3390/nu10030266), 2018-02-26
Supplement: s1 [file s1]

## SUPPLEMENTARY FIGURES AND TABLES

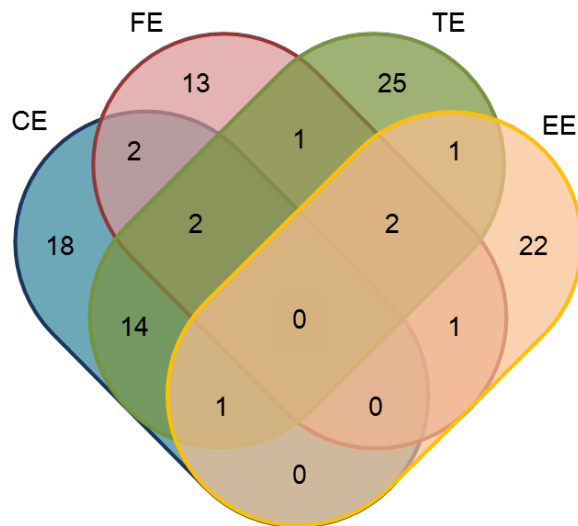

**Supplementary Figure 1. Venn diagram of the number of SNPs identified by the GLM and numbers of overlapping among the four categories.** After filtering the SNPs in the LD group, the final numbers of SNPs for each category are presented in the Venn diagram. CE and TE showed the most number of overlapping SNPs.

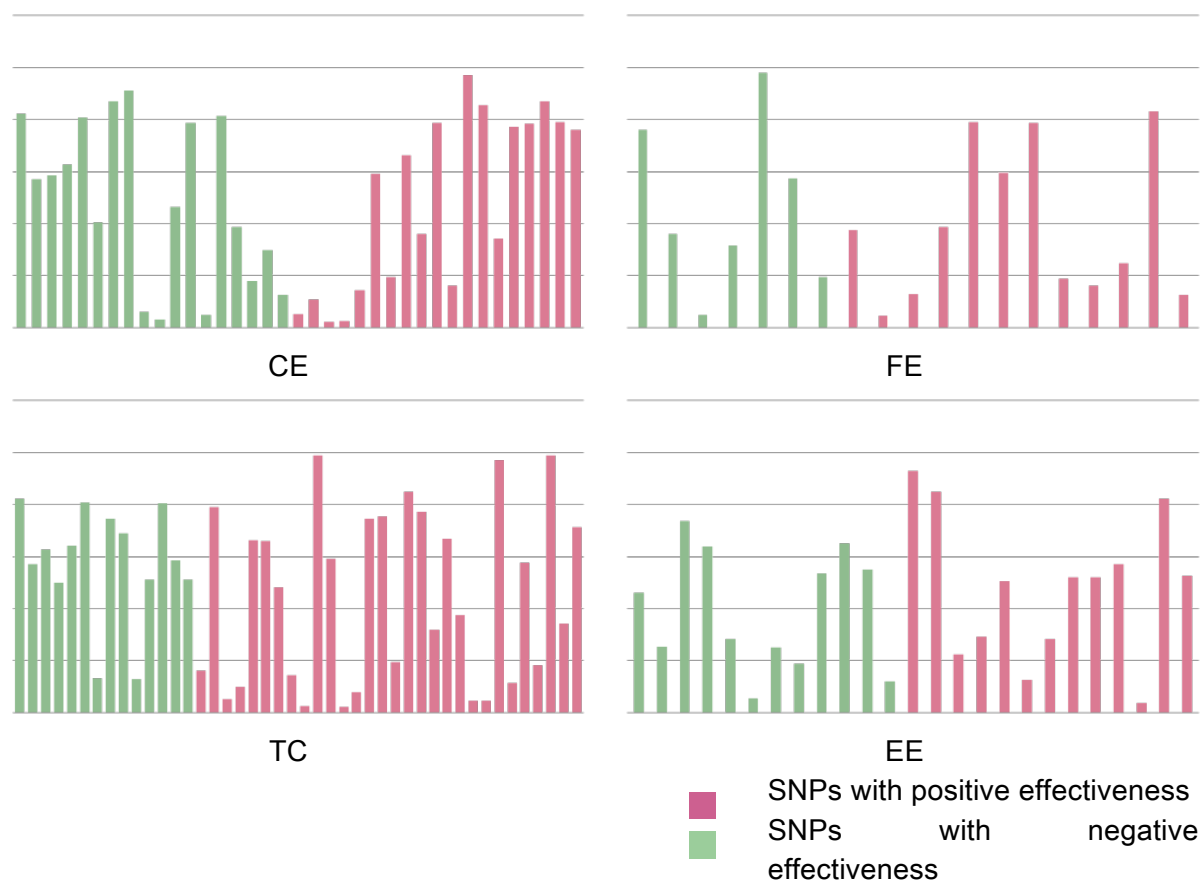

**Supplementary Figure 2. Minor allele frequencies of SNPs that influence the effectiveness of changes in carbohydrate intake (CE), effectiveness of changes in fat intake (FE), effectiveness of changes in total calorie intake, and effectiveness of exercise status (EE).** X-axis indicates the set of SNPs included in the final set of SNPs for scoring genetic risks. Y-axis indicates minor allele frequencies. SNPs with negative effects were colored dark blue, whereas those with positive effects were colored light blue.

| CE              | FE             | TE              | EE             |
|-----------------|----------------|-----------------|----------------|
| AGT (2)         | AGT (2)        | AGT             | ACAP2          |
| ALK             | ARAP1          | ALK             | ADCY5          |
| APOA2           | FAM212B        | APOA2           | AGBL4          |
| ARAP1           | FHIT           | COL16A1         | AGT (2)        |
| CPNE4           | intergenic (7) | COL25A1         | APOA2 (2)      |
| DKFZp686K1684   | KCNH5          | FAM19A2         | ASB4           |
| FAM19A2         | KCNQ1          | FLJ30838        | BDNF-AS1       |
| GLRA3           | PLEKHG5        | GGNBP2          | CRP            |
| intergenic (12) | PPARG (3)      | HDAC9           | CRP            |
| KCNQ1           | STK33          | intergenic (18) | EIF2AK4        |
| MRAS            |                | LOC63930        | ELAVL4         |
| OSBPL10         |                | OSBPL10         | HIVEP1         |
| PPARG (9)       |                | PAX7            | intergenic (4) |
| RPS10-NUDT3     |                | PPARG (10)      | KCNH5          |
| SSBP3           |                | RBFOX1          | LINC00340      |
| TRAF3           |                | RPS10-NUDT3     | MACROD1        |
| USP37           |                | tAKR            | PPARG (2)      |
|                 |                | ZNF131          | RPS10-NUDT3    |
|                 |                |                 | SEC16B         |

**Supplementary Table 1. Gene names of the corresponding SNPs for each category.** Out of 46 SNPs in the CE group, 35 SNPs had corresponding matches to gene names, while 11 SNPs were intergenic. Of 16 SNPs for FE, 13 SNPs matched to a particular gene name, while three SNPs were mapped to intergenic regions. Out of 44 SNPs in the TE category, 26 SNPs were matched to 21 genes and 18 intergenic SNPs. Out of 25 SNPs in the EE category, 21 SNPs had corresponding gene names and four SNPs were intergenic.
